# Supplementary material
Source: publisher figshare collection journal article supplement (https://acs.figshare.com/ndownloader/files/3938350)
Supplement: Supplementary file 1 [file 3938350]

# Performance and Aging of Mn/MnO<sub>2</sub> as an Environmentally Friendly Energetic Time Delay Composition

*Eric J. Miklaszewski<sup>a</sup>, Anthony P. Shaw<sup>b</sup>, Jay C. Pore<sup>b</sup>, Steven F. Son<sup>a</sup>, and Lori J. Groven<sup>a,c,\*</sup>*

<sup>a</sup>Purdue University, School of Mechanical Engineering, West Lafayette, IN 47907, USA

<sup>b</sup>Pyrotechnics Technology and Prototyping Division, US Army RDECOM-ARDEC, Picatinny Arsenal, NJ 07806, USA

<sup>c</sup>South Dakota School of Mines and Technology, Department of Chemical and Biological Engineering, Rapid City, SD 57701, USA

\* Email: [lori.groven@sdsmt.edu](mailto:lori.groven@sdsmt.edu)

## Supporting Information

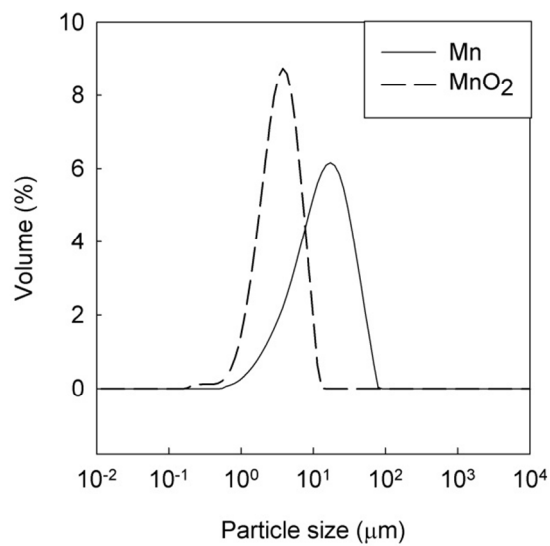

**Figure S1.** Particle size distribution of Mn and MnO<sub>2</sub> powder.

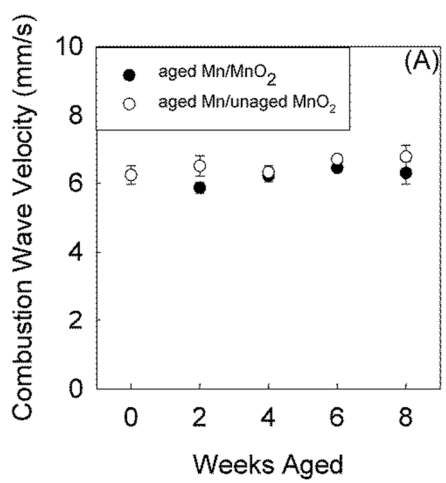

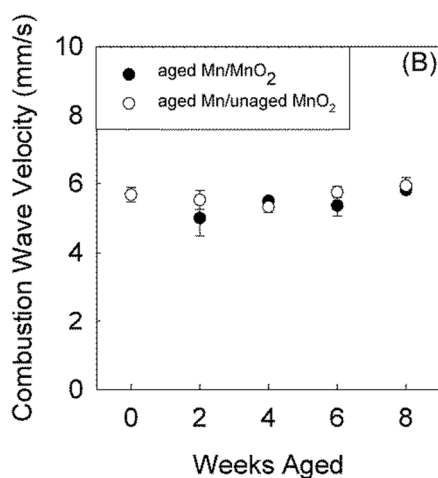

**Figure S2.** Combustion velocities of (A) Mn/MnO<sub>2</sub> (50/50) and (B) Mn/MnO<sub>2</sub> (60/40) as a function of aging duration. Open circles show data for aged Mn/unaged MnO<sub>2</sub> compositions and closed circles show data for aged Mn/MnO<sub>2</sub> compositions.

#### **Si/Bi<sub>2</sub>O<sub>3</sub> and W/BaCrO<sub>4</sub>/KClO<sub>4</sub>/Diatomaceous Earth Compositions Mixing Method.**

Si/Bi<sub>2</sub>O<sub>3</sub> and W/BaCrO<sub>4</sub>/KClO<sub>4</sub>/diatomaceous earth mixtures were dry mixed in 30mL HDPE bottles using the following procedure:

- (1) Mix with Resodyn LabRAM mixer at 40% intensity for one minute
- (2) Passed through a 50 mesh sieve
- (3) Mix with Resodyn LabRAM mixer at 40% intensity for one minute
- (4) Passed through a 50 mesh sieve
- (5) Mix with Resodyn LabRAM mixer at 40% intensity for one minute

#### **A1A Composition Mixing Method.**

For safety, the A1A composition was wet mixed with a spatula in ethanol (~5 mL per gram of mixture) and then dried on a hot plate at 40 °C.

## Additional Combustion Experiments in Aluminum Tubes and Hand-Held Signal Delay Housings.

Nominal sizing and vendor information for the powders used in experiments **in this section only** are summarized in Table S1. Particle size distributions for Mn and MnO<sub>2</sub> were obtained using a Microtrac S3500 laser diffraction particle size analyzer with water as the dispersant. Figure S2 shows the Mn and MnO<sub>2</sub> particle size data for the powders used.

**Table S1.** Vendor information of reactant powders used in supplemental experiments.

| Powder                         | Nominal Particle Size            | Vendor     |
|--------------------------------|----------------------------------|------------|
| Bi <sub>2</sub> O <sub>3</sub> | 15.4 $\mu\text{m}$               | Alfa Aesar |
| Black Powder                   | Class 7, 40-100 mesh             | --         |
| Mn                             | -10 micron                       | AEE        |
| MnO <sub>2</sub>               | -325 mesh                        | Alfa Aesar |
| Si                             | MIL-S-230C, Grade 2, Class C AEE |            |

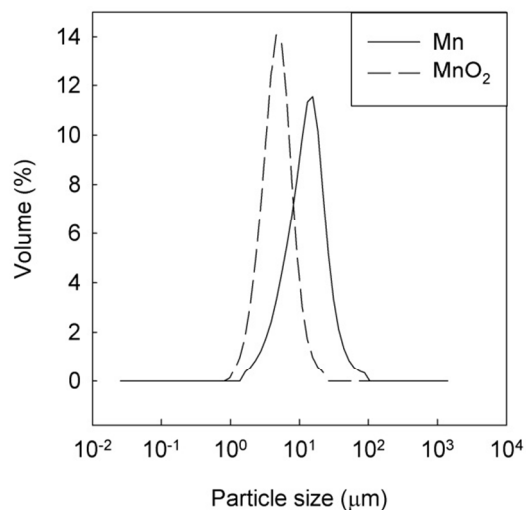

**Figure S3.** Particle size distribution of Mn and MnO<sub>2</sub> powder used for supplemental experiments.

Delay mixes were prepared by combining the components in conductive containers. Each was mixed on a vibrating shaker for 5 min, passed through a 30 mesh screen to remove any clumps, and then shaken again for another 10 min.

Aluminum tubes (15.24 mm long, 9.53 mm outer diameter, 4.74 mm inner diameter) and hand-held signal (HHS) delay housings<sup>1</sup> were loaded in two increments in the following order:

- (1) 0.030 grams black powder (class 7)
- (2) 0.050 grams 30/70 Si/Bi<sub>2</sub>O<sub>3</sub> igniter
- (3) first portion of delay mix
- (4) press at 227 kg force (124.9 MPa)
- (5) second portion of delay mix (same amount as in step 3)
- (6) 0.030 grams black powder (class 7)
- (7) press at 227 kg force (124.9 MPa)

The amount of delay composition was chosen such that the finished tubes and delay elements were nearly full. Column lengths for the tubes ranged from 11.84-12.12 mm. Column lengths for the HHS housings ranged from 8.76-10.01 mm. The finished items were ignited from the Si/Bi<sub>2</sub>O<sub>3</sub> side with an electrically heated nichrome wire. Digital video recordings at 30 frames per second were used to determine functioning times. Linear column burning rates were calculated by dividing the column lengths by these times. For each composition and configuration, 5 items were prepared and tested and the results averaged.

**Table S2.** Combustion Experiment Data in Aluminum Tubes and HHS Delay Housings.

| Mixture<br>(Mn/MnO <sub>2</sub> ) | Configuration | Amount of Delay<br>Composition (g) | Average Rate<br>(mm/s) | Rate Standard<br>Deviation |
|-----------------------------------|---------------|------------------------------------|------------------------|----------------------------|
| 35/65                             | tube          | 0.57                               | 6.12                   | 0.21                       |
| 45/55                             | tube          | 0.60                               | 9.42                   | 0.38                       |
| 65/35                             | tube          | 0.63                               | 6.27                   | 0.10                       |
| 35/65                             | HHS housing   | 0.46                               | 6.19                   | 0.22                       |
| 45/55                             | HHS housing   | 0.47                               | 8.73                   | 0.32                       |
| 65/35                             | HHS housing   | 0.48                               | 5.86                   | 0.07                       |

## References

1. Poret, J. C.; Shaw, A. P.; Csernica, C. M.; Oyler, K. D.; Estes, D. P., Development and Performance of the W/Sb<sub>2</sub>O<sub>3</sub>/KIO<sub>4</sub>/Lubricant Pyrotechnic Delay in the US Army Hand-Held Signal. *Propellants, Explos., Pyrotech.* **2012**, 38, 35-40.
